# Supplementary material
Source: PubMed Central journal article supplement (PMC2671892)
Supplement: en.2008-1442_1.pdf [file en.2008-1442_1.pdf]

**Table 1.** I<sub>SK</sub> Response to GnRH in Voltage-Clamped Gonadotrophs

| Treatment                                            | C <sub>m</sub><br>(pF)   | Baseline I <sub>m</sub><br>(pA/pF) | 1 nM GnRH Response <sup>1</sup> |                                |                                 |                                              |                                    |
|------------------------------------------------------|--------------------------|------------------------------------|---------------------------------|--------------------------------|---------------------------------|----------------------------------------------|------------------------------------|
|                                                      |                          |                                    | Oscillations<br>Number          | Oscillations<br>Frequency (Hz) | Peak I <sub>SK</sub><br>(pA/pF) | <sup>2</sup> Mean I <sub>SK</sub><br>(pA/pF) | <sup>3</sup> Area/osc<br>(pA·s/pF) |
| No steroid<br>(n = 41)                               | 7.04 ± 0.15 <sup>a</sup> | 0.9 ± 0.1 <sup>a</sup>             | 15 ± 1 <sup>a</sup>             | 0.14 ± 0.01 <sup>a</sup>       | 9.6 ± 0.8 <sup>b</sup>          | 3.7 ± 0.4 <sup>b</sup>                       | 27 ± 3 <sup>b</sup>                |
| E <sub>2</sub> pretreatment <sup>4</sup><br>(n = 34) | 7.20 ± 0.20              | 1.1 ± 0.1                          | 14 ± 2                          | 0.15 ± 0.01                    | 5.7 ± 0.6                       | 2.2 ± 0.3                                    | 16 ± 2                             |

Mean ± SEM; V<sub>m</sub> = -66 mV; 1 min GnRH exposure

<sup>1</sup>Current response to GnRH was taken as time from the first detectable I<sub>m</sub> change from baseline after start of GnRH exposure until the current returned to baseline. Within this time period the baseline corrected peak and mean I<sub>m</sub> and area under the response were determined on records filtered at 100 Hz post-acquisition using Clampfit (pClamp software suite). Oscillation frequency was determined from the number of oscillations and the length of the response.

<sup>2</sup>Average I<sub>SK</sub> during the response to GnRH

<sup>3</sup>Area under the I<sub>SK</sub> response divided by the number of oscillations

<sup>4</sup>E<sub>2</sub>, 0.2 nM, 2 – 5 days

<sup>a</sup>No steroid and E<sub>2</sub> pretreatment values are not different from each other.

<sup>b</sup>No steroid value significantly different from E<sub>2</sub> pretreatment value, *P* < 0.008
